# Supplementary material
Source: PubMed Central journal article supplement (PMC9647470)
Supplement: NIHMS1845894-supplement-Supplementary_Information.pdf [file NIHMS1845894-supplement-Supplementary_Information.pdf]

# Writing and erasing O-GlcNAc on casein kinase 2 alpha alters the phosphoproteome

## Supporting Information

**Authors:** Paul A. Schwein<sup>1</sup>, Yun Ge<sup>1</sup>, Bo Yang<sup>1</sup>, Alexandria D'Souza<sup>1</sup>, Alison Mody<sup>1</sup>, Dacheng Shen<sup>1</sup>, Christina M. Woo<sup>1,\*</sup>

<sup>1</sup> Department of Chemistry and Chemical Biology, 12 Oxford St, Cambridge, MA, USA 02138

\* Corresponding author: [cwoo@chemistry.harvard.edu](mailto:cwoo@chemistry.harvard.edu)

## Index

|                                                                                                                                         |           |
|-----------------------------------------------------------------------------------------------------------------------------------------|-----------|
| <b>Supplementary Figures.....</b>                                                                                                       | <b>2</b>  |
| <i>Supplementary Figure 1 – Endogenous CK2<math>\alpha</math> Levels Following OGT or OGA Inhibition.....</i>                           | 2         |
| <i>Supplementary Figure 2 – Phosphoproteomics Workflow.....</i>                                                                         | 3         |
| <i>Supplementary Figure 3 – Nanobody-OGT Phosphoprotein Level Normalization Box Plot.....</i>                                           | 4         |
| <i>Supplementary Figure 4 – Nanobody-OGT Phosphoprotein Level Principal Component Analysis .....</i>                                    | 5         |
| <i>Supplementary Figure 5 – Nanobody-splitOGA Phosphoprotein Level Normalization Box Plot .....</i>                                     | 6         |
| <i>Supplementary Figure 6 – Nanobody-OGA Phosphoprotein Level Principal Component Analysis .....</i>                                    | 7         |
| <i>Supplementary Figure 7 – Nanobody-OGT Phosphosite Level Normalization Box Plot.....</i>                                              | 8         |
| <i>Supplementary Figure 8 – Nanobody-OGT Phosphosite Level Principal Component Analysis.....</i>                                        | 9         |
| <i>Supplementary Figure 9 – Nanobody-splitOGA Phosphosite Level Normalization Box Plot .</i>                                            | 10        |
| <i>Supplementary Figure 10 – Nanobody-splitOGA Phosphosite Level Principal Component Analysis .....</i>                                 | 11        |
| <i>Supplementary Figure 11 – STRING network of phosphoproteins negatively correlated with CK2<math>\alpha</math> glycosylation.....</i> | 12        |
| <b>Supplementary Tables .....</b>                                                                                                       | <b>13</b> |
| <i>Supplementary Table 1 – MS Data (protein level hits) .....</i>                                                                       | 13        |
| <i>Supplementary Table 2 – MS Data (site level hits) .....</i>                                                                          | 14        |

## Supplementary Figures

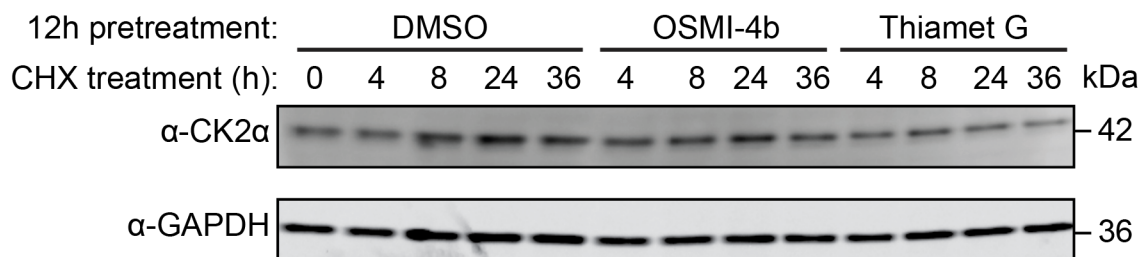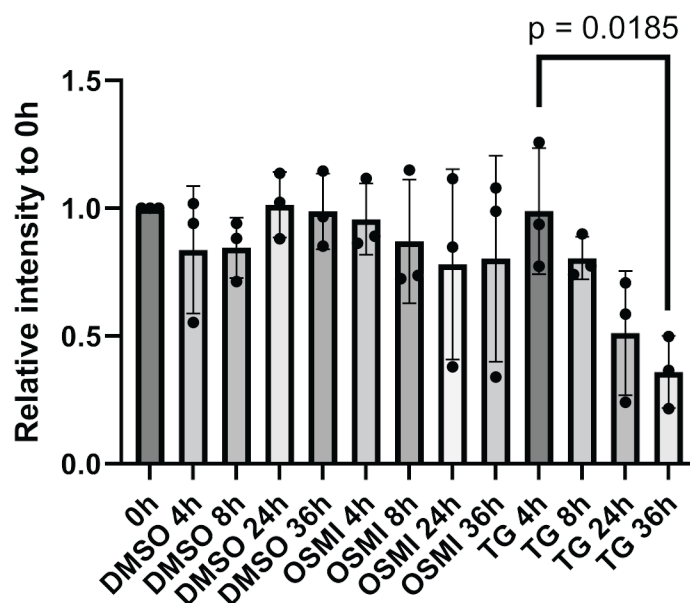

### Supplementary Figure 1 – Endogenous CK2 $\alpha$ Levels Following OGT or OGA Inhibition

HEK293T cells in 6-well plates were treated with 50  $\mu$ M OSMI-4b, 100  $\mu$ M Thiamet G, or an equivalent volume of DMSO for 12 h before addition of 1X cycloheximide. Cell lysates were then collected at the notated timepoints and were separated by SDS-PAGE. CK2 $\alpha$  and GAPDH protein levels were measured by Western blot, and CK2 $\alpha$  intensity was normalized to the corresponding GAPDH intensity in ImageJ for quantification. Error bars are representative of three independent replicates. A two-tailed Student's *t*-test was used for statistical analysis.

Nanobody-OGT conditions:  
(in triplicate)

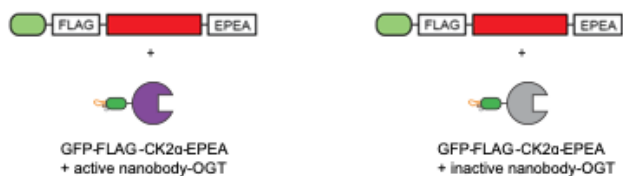

Nanobody-splitOGA conditions:  
(in triplicate)

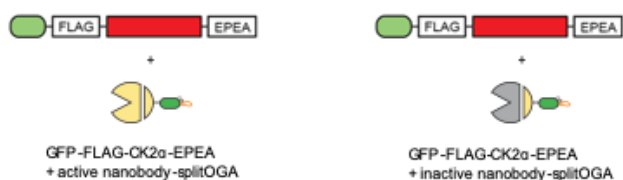

Lysate preparation

Reduction/alkylation  
Trypsinization  
Desalting

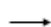

MS sample preparation

TiO<sub>2</sub> phosphopeptide enrichment  
TMT labeling  
High pH fractionation

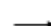

LC-MS/MS & Data Analysis

**Supplementary Figure 2 – Phosphoproteomics Workflow**

Cells were lysed by adding 1 mL of lysis buffer containing phosphatase inhibitors. Protein concentrations were determined by BCA assay. Reduction and alkylation were performed as previously described. S-trap digestion was done according to the manufacturer's instructions resulting in 0.8 mg tryptic peptides/sample. Samples were desalted and dried. The enrichment of phosphopeptides was performed by TiO<sub>2</sub> Phosphopeptide Enrichment Kit. Briefly, approximately 0.8 mg of tryptic peptides were resuspended in 150 μL of Binding/Equilibration buffer. The suspended peptide sample was added to a pre-equilibrated TiO<sub>2</sub> spin tip and centrifuged at 1000 × g for 5 minutes. The spin tip was then washed with 20 μL of Binding/Equilibration/Wash Buffer for three times, and eluted by 50 μL of Elution buffer for two times. The eluates were evaporated to near dryness and subjected to the TMT-labeling. For each sample, 10 μL the corresponding amine-based TMT 10-plex reagents (10 μg/μL) was added and reacted for 1 h at room temperature. The reactions were quenched with 2 μL 5% hydroxylamine solution and combined. The combined mixture was concentrated to dryness. High-pH fractionation (ThermoFisher Scientific) was done according to the manufacturer's instructions resulting in 6 fractions.

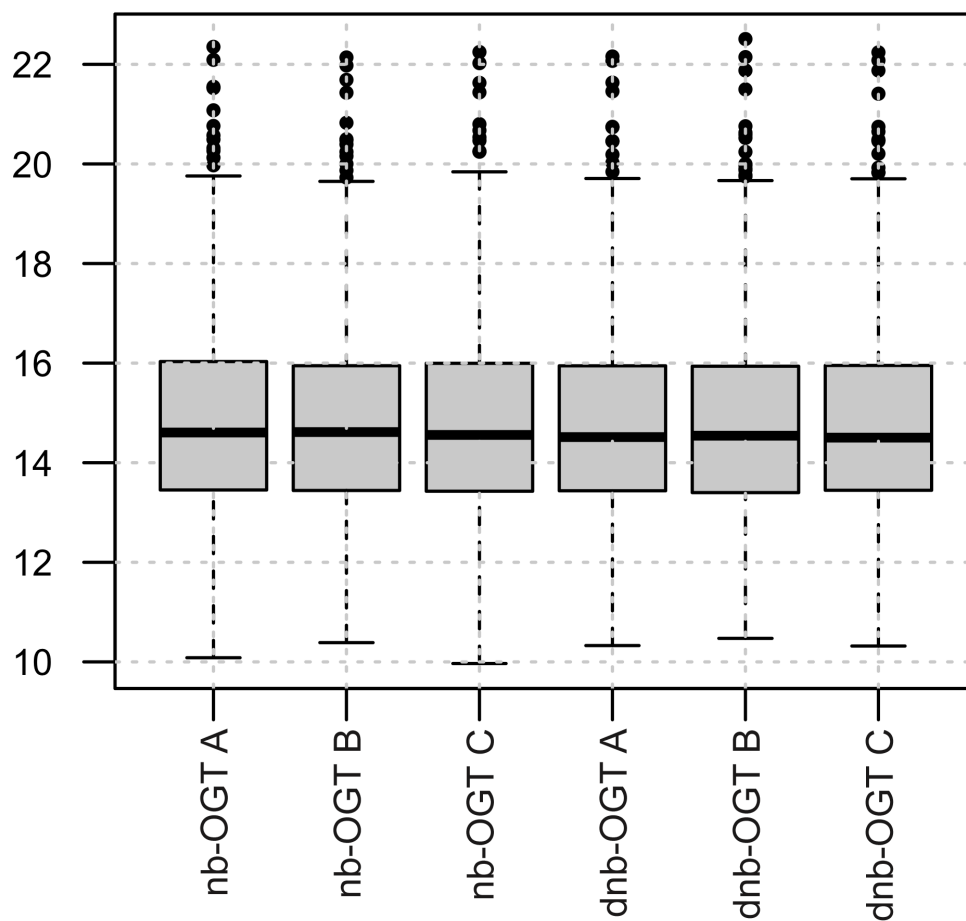

**Supplementary Figure 3 – Nanobody-OGT Phosphoprotein Level Normalization Box Plot**  
 Normalization of TMT channels during protein-level analysis of nanobody-OGT phosphoproteomics experiment. Each channel represents GFP-FLAG-CK2 $\alpha$ -EPEA co-transfected with active or inactive nanobody-OGT. nb-OGT = active nanobody-OGT, dnb-OGT = inactive nanobody-OGT.

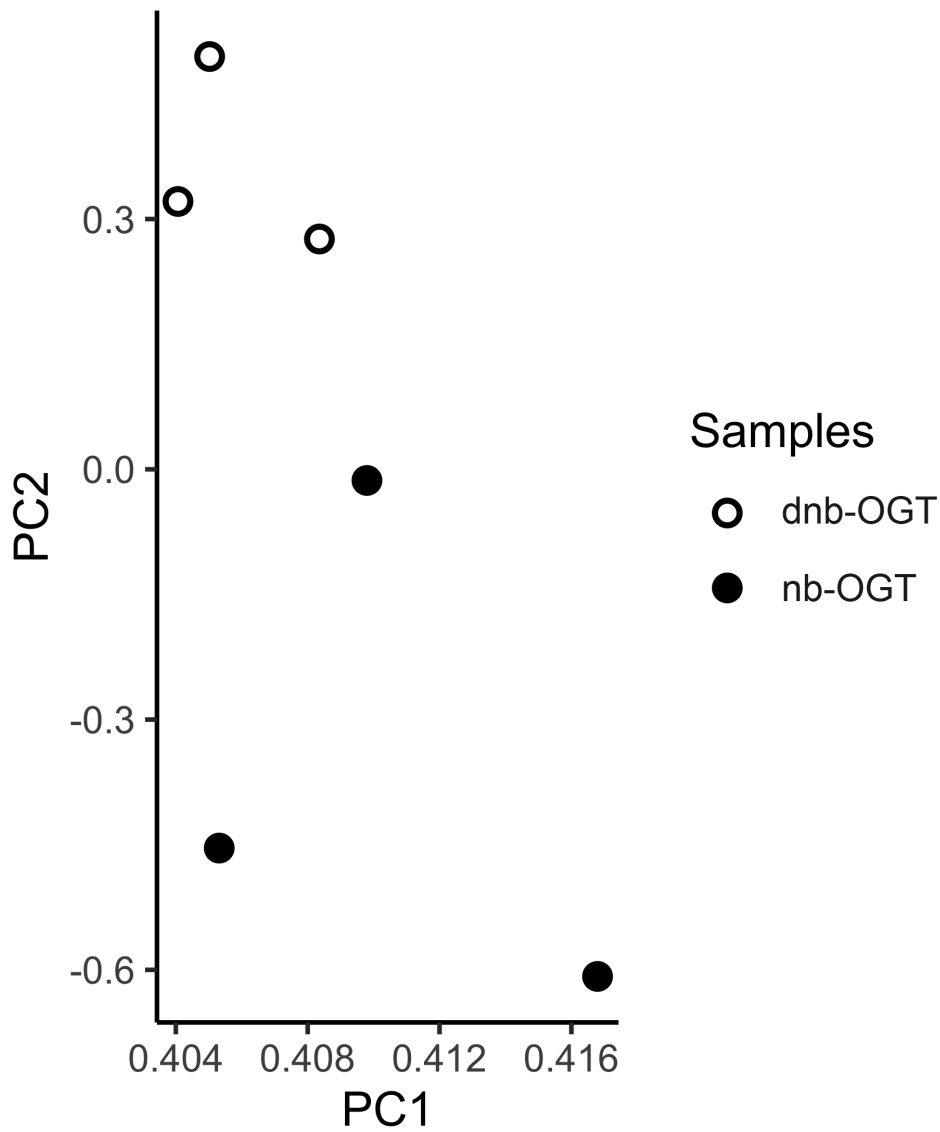

**Supplementary Figure 4 – Nanobody-OGT Phosphoprotein Level Principal Component Analysis**

Principal component analysis of nanobody-OGT protein level data indicating independent clustering between the control (inactive nanobody-OGT co-transfection) and treatment (active nanobody-OGT co-transfection). ■ nb-OGT = active nanobody-OGT, ○ dnb-OGT = inactive nanobody-OGT.

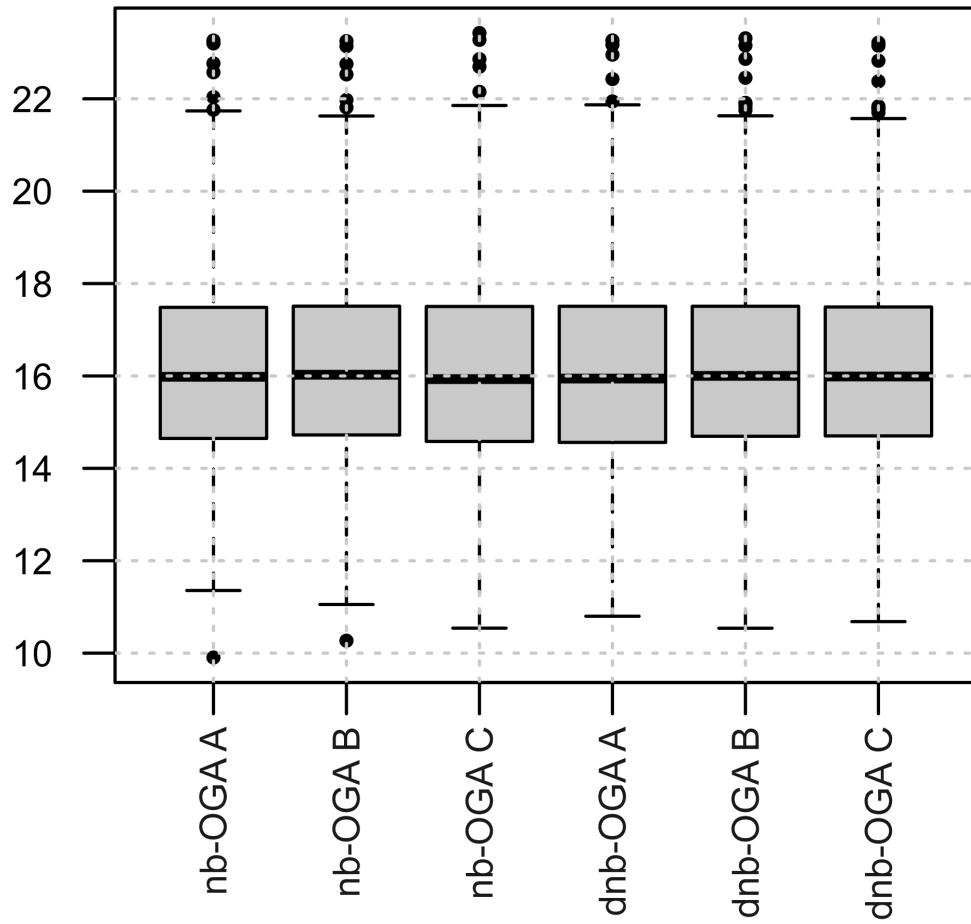

**Supplementary Figure 5 – Nanobody-splitOGA Phosphoprotein Level Normalization Box Plot**

Normalization of TMT channels during protein-level analysis of nanobody-splitOGA phosphoproteomics experiment. Each channel represents GFP-FLAG-CK2 $\alpha$ -EPEA co-transfected with active or inactive nanobody-splitOGA. nb-OGA = active nanobody-splitOGA, dnb-OGA = inactive nanobody-splitOGA.

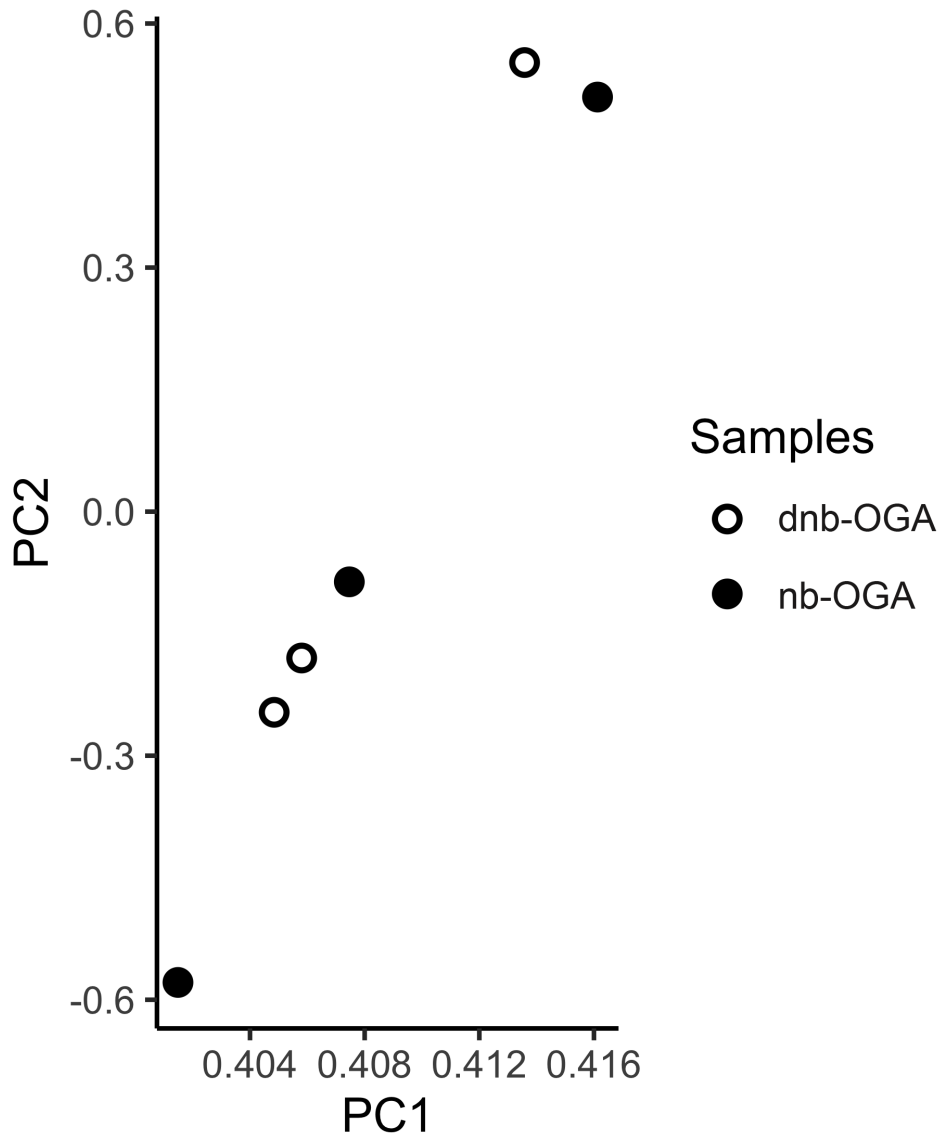

**Supplementary Figure 6 – Nanobody-OGA Phosphoprotein Level Principal Component Analysis**

Principal component analysis of nanobody-splitOGA protein level data indicating clustering between the control (inactive nanobody-splitOGA co-transfection) and treatment (active nanobody-splitOGA co-transfection). nb-OGA = active nanobody-splitOGA, dnb-OGA = inactive nanobody-splitOGA.

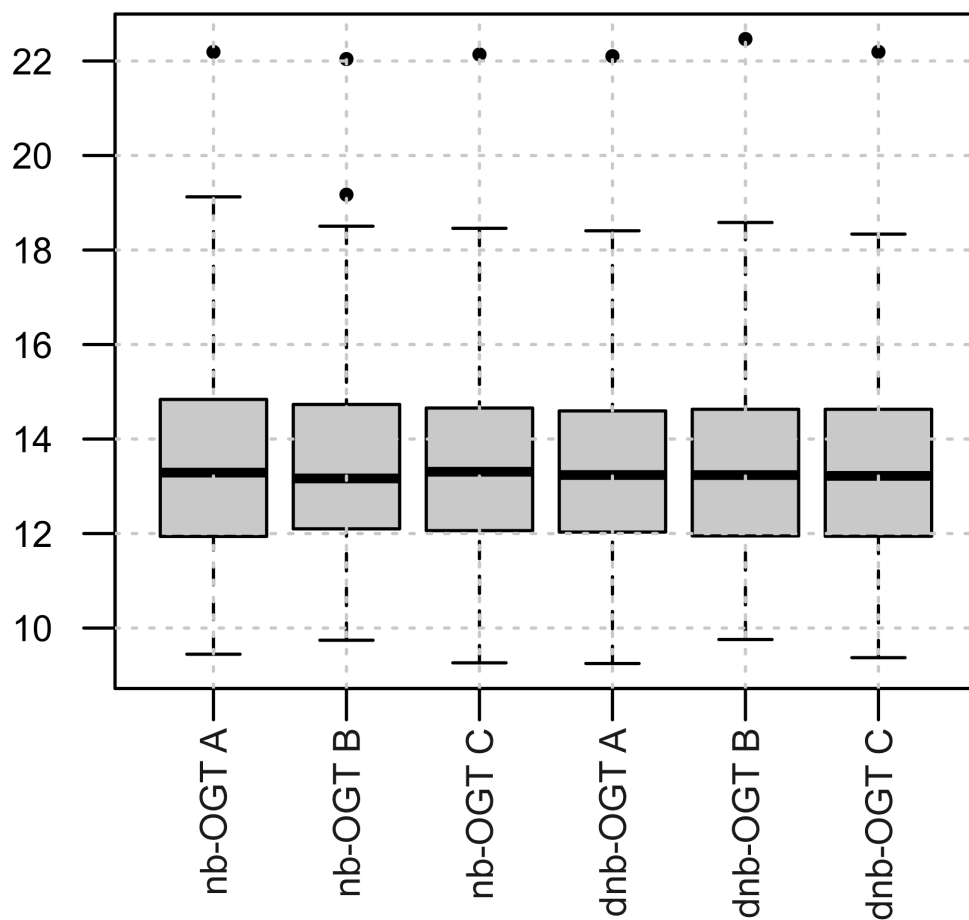

**Supplementary Figure 7 – Nanobody-OGT Phosphosite Level Normalization Box Plot**

Normalization of TMT channels during site-level analysis of nanobody-OGT phosphoproteomics experiment. Each channel represents GFP-FLAG-CK2 $\alpha$ -EPEA co-transfected with active or inactive nanobody-OGT. nb-OGT = active nanobody-OGT, dnb-OGT = inactive nanobody-OGT.



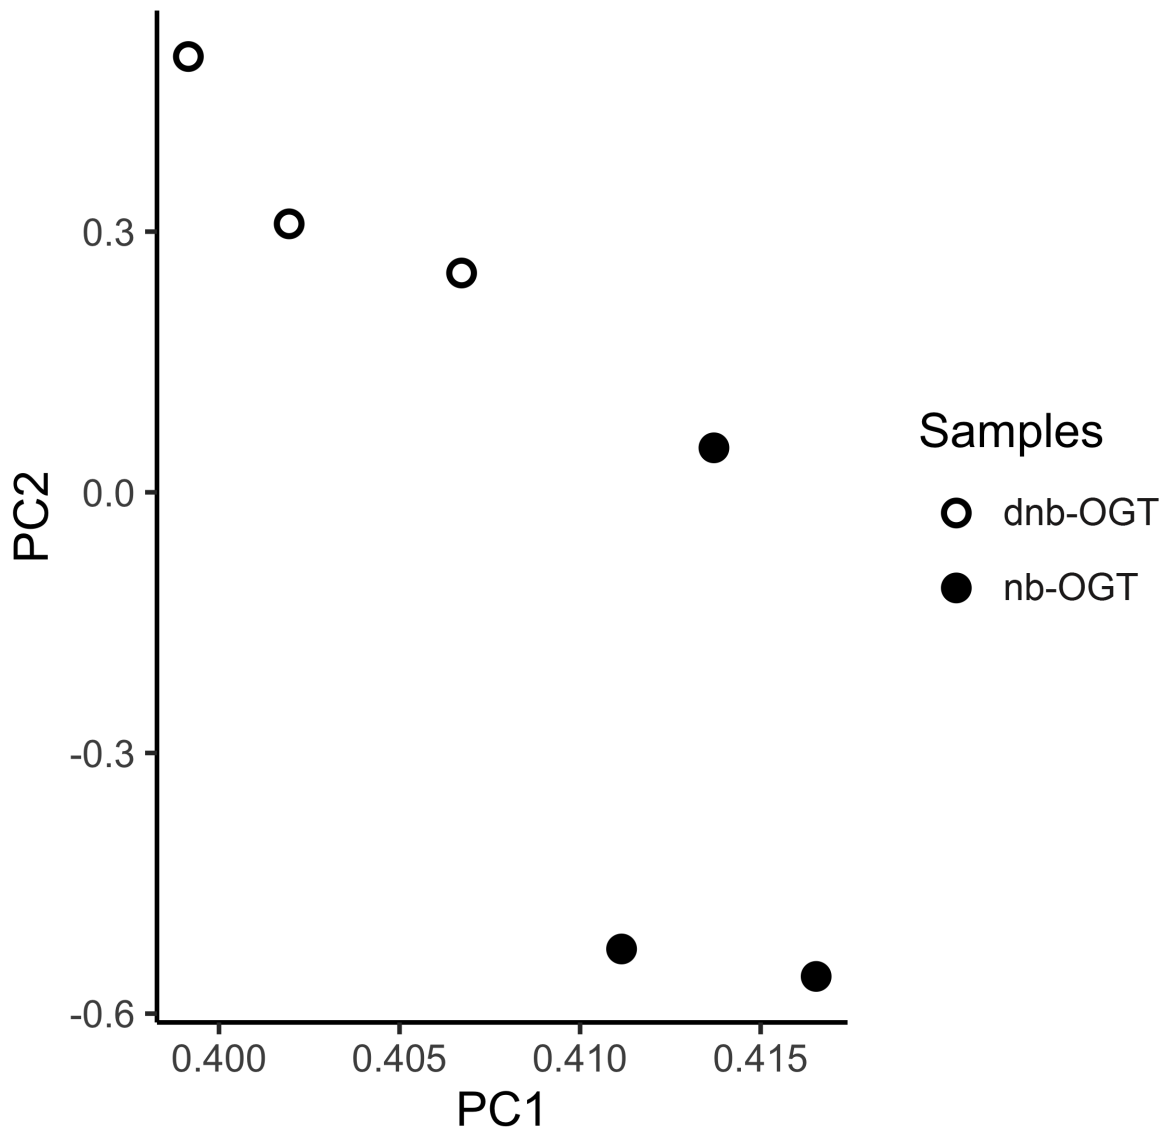

**Supplementary Figure 8 – Nanobody-OGT Phosphosite Level Principal Component Analysis**

Principal component analysis of nanobody-OGT phosphosite level data indicating independent clustering between the control (inactive nanobody-OGT co-transfection) and treatment (active nanobody-OGT co-transfection). nb-OGT = active nanobody-OGT, dnb-OGT = inactive nanobody-OGT.

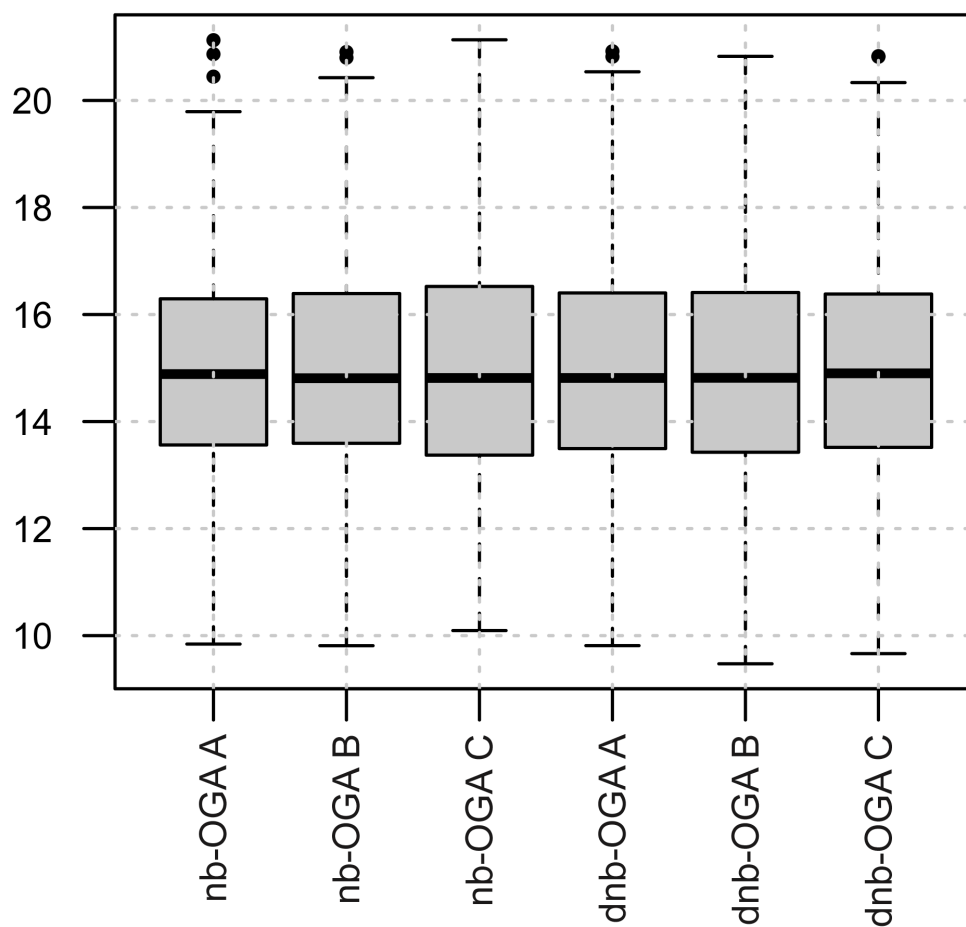

**Supplementary Figure 9 – Nanobody-splitOGA Phosphosite Level Normalization Box Plot**  
 Normalization of TMT channels during site-level analysis of nanobody-splitOGA phosphoproteomics experiment. Each channel represents GFP-FLAG-CK2 $\alpha$ -EPEA co-transfected with active or inactive nanobody-splitOGA. nb-OGA = active nanobody-splitOGA, dnb-OGA = inactive nanobody-splitOGA.

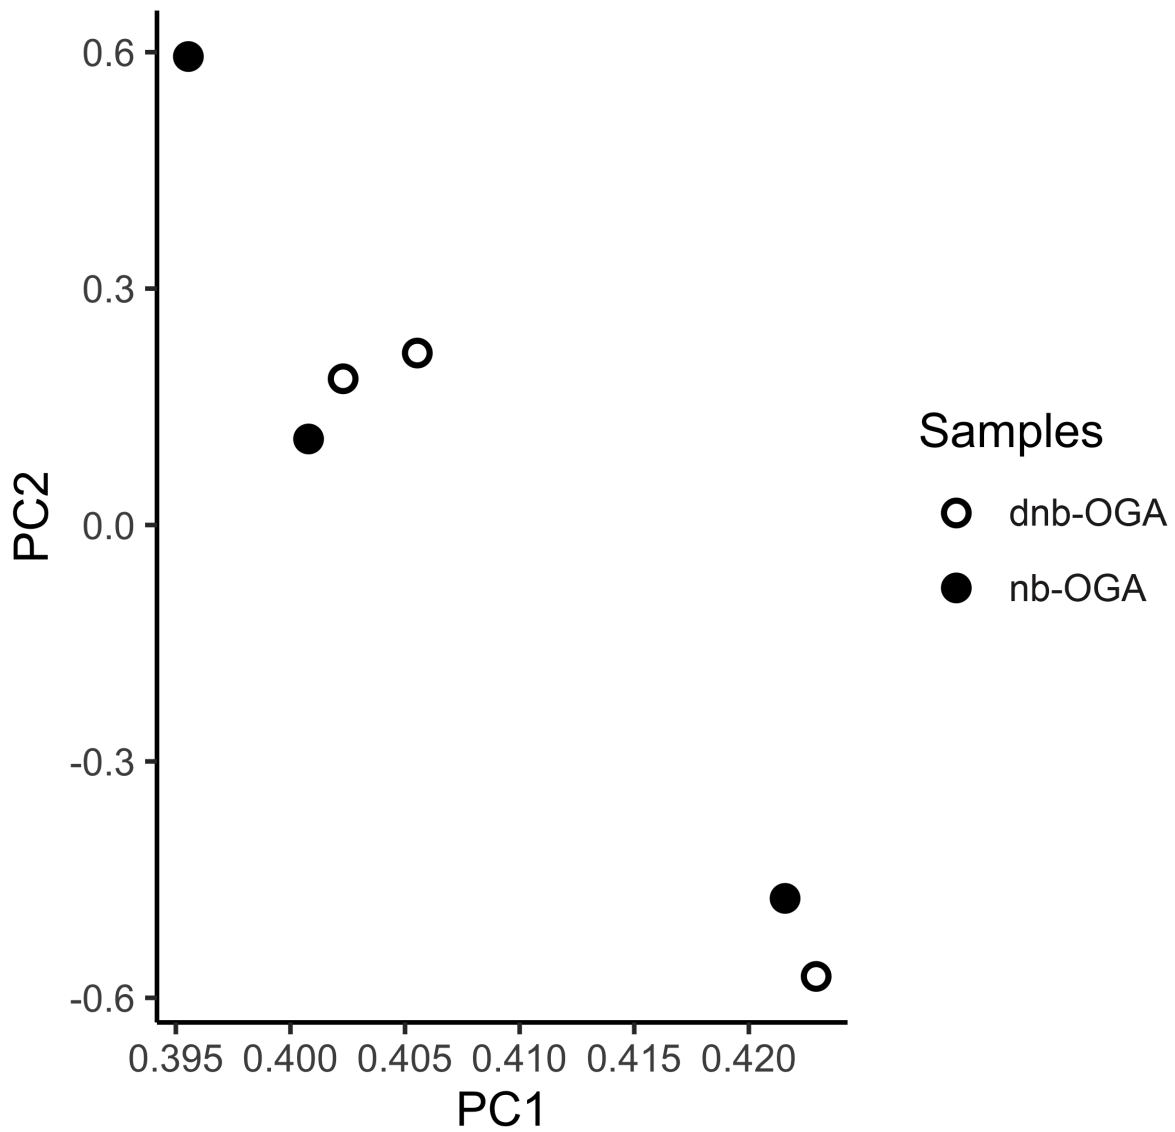

**Supplementary Figure 10 – Nanobody-splitOGA Phosphosite Level Principal Component Analysis**

Principal component analysis of nanobody-splitOGA phosphosite level data indicating clustering between the control (inactive nanobody-splitOGA co-transfection) and treatment (active nanobody-splitOGA co-transfection). nb-OGA = active nanobody-splitOGA, dnb-OGA = inactive nanobody-splitOGA.

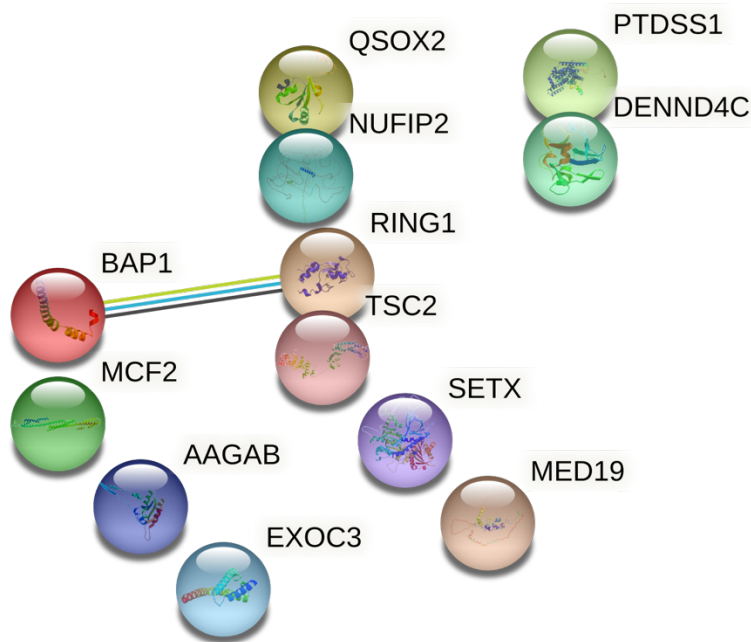

**Supplementary Figure 11 – STRING network of phosphoproteins negatively correlated with CK2 $\alpha$  glycosylation**

Phosphoproteins that significantly increased in enrichment in the nanobody-splitOGA condition or decreased in the nanobody-OGT condition were compiled and imported into STRING for interactome analysis. Only BAP1 and RING1 are functionally associated (with ubiquitination of histones).

## Supplementary Tables

Supplementary Table 1 – MS Data (protein level hits)

| Gene Name | PDB ID | Log <sub>2</sub> (FC)<br>OGT | P value<br>OGT | Log <sub>2</sub> (FC)<br>OGA | P value<br>OGA | Reported<br>CK2<br>sub.? |
|-----------|--------|------------------------------|----------------|------------------------------|----------------|--------------------------|
| MARCKS    | P29966 | 1.36750281                   | 3.8657E-07     | -0.009162                    | 0.89814825     | No                       |
| ILF3      | Q12906 | 1.19323052                   | 0.01876606     | -0.0733866                   | 0.30002011     | No                       |
| HDAC1     | Q13547 | 1.08712459                   | 0.00351943     | -0.0990389                   | 0.43198513     | Yes <sup>30</sup>        |
| HMGB2     | P26583 | 1.06279556                   | 2.0455E-05     | N/A                          | N/A            | Yes <sup>17</sup>        |
| HDAC2     | Q92769 | 1.05118692                   | 0.00777629     | -0.0332643                   | 0.6414608      | Yes <sup>30</sup>        |
| UGP2      | Q16851 | 1.05007777                   | 0.00600021     | N/A                          | N/A            | No                       |
| EPB41L2   | O43491 | 1.02714016                   | 5.6632E-06     | -0.0670828                   | 0.32753689     | No                       |
| RPL27A    | P46776 | 0.99070725                   | 3.5807E-05     | N/A                          | N/A            | No                       |
| RPL34     | P49207 | 0.95956758                   | 4.3797E-05     | -0.5646497                   | 0.00012171     | No                       |
| TPD52L2   | O43399 | 0.93300518                   | 0.00016678     | 0.42744399                   | 0.00058086     | No                       |
| HCFC1     | P51610 | 0.91898783                   | 0.00905294     | -0.0628119                   | 0.53619673     | No                       |
| RPS3A     | P61247 | 0.90641691                   | 0.00299694     | N/A                          | N/A            | No                       |
| DDX42     | Q86XP3 | 0.8890198                    | 0.01237976     | N/A                          | N/A            | No                       |
| ENSA      | O43768 | 0.87119279                   | 9.9768E-05     | -0.6537205                   | 6.5355E-05     | No                       |
| MYLK3     | Q32MK0 | 0.83529321                   | 0.01151515     | N/A                          | N/A            | No                       |
| MED19     | A0JLT2 | -0.7632699                   | 0.00107056     | 0.12685194                   | 0.53994595     | No                       |
| AKT1S1    | Q96B36 | 0.7265354                    | 0.00116863     | -0.0565795                   | 0.60974879     | No                       |
| UTP14A    | Q9BVJ6 | 0.70578475                   | 0.01287049     | N/A                          | N/A            | No                       |
| IQSEC1    | Q6DN90 | 0.68529865                   | 0.00801551     | -0.1387021                   | 0.11543139     | No                       |
| NFIC      | P08651 | 0.6787496                    | 0.00091429     | N/A                          | N/A            | No                       |
| TBC1D4    | O60343 | 0.67332465                   | 0.00297638     | -0.0780943                   | 0.48076431     | No                       |
| MDH1      | P40925 | 0.63299339                   | 0.01058569     | -0.0878243                   | 0.18815606     | No                       |
| PTDSS1    | P48651 | -0.6310514                   | 0.00060673     | 0.03246701                   | 0.85838788     | No                       |
| QSOX2     | Q6ZRP7 | -0.6246512                   | 0.00211926     | N/A                          | N/A            | No                       |
| BAP1      | Q92560 | -0.6224754                   | 0.01120594     | N/A                          | N/A            | No                       |
| SMARCAD1  | Q9H4L7 | 0.60898284                   | 0.00020408     | -0.6594163                   | 0.00011993     | No                       |
| KHSRP     | Q92945 | 0.60236907                   | 3.8665E-05     | -0.1613364                   | 0.29451128     | No                       |
| EXOC3     | O60645 | -0.5971443                   | 0.0486203      | N/A                          | N/A            | No                       |
| RBM34     | P42696 | 0.59702178                   | 0.00036202     | -0.37369                     | 0.00385585     | No                       |
| DENND4C   | Q5VZ89 | -0.5898665                   | 0.00721184     | -0.0054706                   | 0.93685289     | No                       |
| SETX      | Q7Z333 | -0.5887437                   | 0.00054032     | N/A                          | N/A            | Yes <sup>31</sup>        |
| MCF2      | P10911 | -0.5832619                   | 0.00114332     | N/A                          | N/A            | No                       |
| DAXX      | Q9UER7 | 0.55998809                   | 0.01803783     | -0.0409057                   | 0.53149013     | Yes <sup>30</sup>        |
| LUC7L3    | O95232 | 0.54222196                   | 0.00549679     | N/A                          | N/A            | No                       |
| RING1     | Q06587 | -0.5355431                   | 0.01986045     | -0.1315409                   | 0.81440089     | No                       |
| PFKP      | Q01813 | 0.53464855                   | 0.00202774     | -0.6693487                   | 3.1213E-05     | No                       |
| NCBP3     | Q53F19 | 0.53253321                   | 0.04912922     | 0.08806703                   | 0.25442596     | No                       |
| AAGAB     | Q6PD74 | -0.5202489                   | 0.00104418     | N/A                          | N/A            | No                       |
| RIOX2     | Q8IUF8 | 0.51598347                   | 0.00231079     | N/A                          | N/A            | No                       |
| ADAM22    | Q9P0K1 | 0.50719107                   | 0.00485886     | N/A                          | N/A            | No                       |
| RPL37     | P61927 | 0.50432442                   | 0.0053132      | N/A                          | N/A            | No                       |
| TFAM      | Q00059 | 0.50214963                   | 0.0122408      | 0.03561791                   | 0.57239368     | No                       |

|          |        |            |            |            |            |    |
|----------|--------|------------|------------|------------|------------|----|
| PABPN1   | Q86U42 | 0.02174837 | 0.8726238  | -1.2207843 | 0.00080145 | No |
| SRSF2    | Q01130 | -0.1694018 | 0.07328998 | -0.9482095 | 3.1687E-06 | No |
| NUFIP2   | Q7Z417 | 0.07818113 | 0.51571786 | 0.6055824  | 0.01815937 | No |
| MOV10    | Q9HCE1 | N/A        | N/A        | -0.5864239 | 0.00018435 | No |
| RBBP7    | Q16576 | N/A        | N/A        | -0.568389  | 0.00683292 | No |
| PPP1R12A | O14974 | 0.31895842 | 0.03708686 | -0.5415793 | 0.00054957 | No |
| REEP5    | Q00765 | N/A        | N/A        | -0.5286674 | 7.9512E-05 | No |
| RAD23A   | P54725 | -0.0433452 | 0.72509578 | -0.5268616 | 0.01010218 | No |
| TSC2     | P49815 | 0.0960385  | 0.27813694 | 0.5065094  | 0.00076195 | No |

**Supplementary Table 2 – MS Data (site level hits)**

| Gene Name | PDB ID | Phospho-site | Condition | Log <sub>2</sub> (FC) | P value    | Reported CK2 sub.? |
|-----------|--------|--------------|-----------|-----------------------|------------|--------------------|
| MARCKS    | P29966 | S170         | OGT       | 1.47934               | 6.6677E-06 | No                 |
| HMGB2     | P26583 | T179         | OGT       | 1.01355               | 0.00013414 | Yes <sup>17</sup>  |
| HDAC1     | Q13547 | S343         | OGT       | 1.06832832            | 0.00567005 | Yes <sup>32</sup>  |
| HDAC2     | Q92769 | S394         | OGT       | 1.04528135            | 0.00861108 | Yes <sup>32</sup>  |
| UGP2      | Q16851 | Y248         | OGT       | 1.02774156            | 0.00953618 | No                 |
| CWC25     | Q9NxE8 | S218         | OGT       | 1.04628939            | 0.0209202  | No                 |
| ILF3      | Q12906 | S382         | OGT       | 1.36850275            | 0.0200335  | No                 |
| EPB41L2   | O43491 | S550         | OGT       | 1.02099418            | 0.01224519 | No                 |
| MDC1      | Q14676 | T404         | OGT       | 2.21424469            | 0.03398253 | Yes <sup>48</sup>  |
| MDC1      | Q14676 | S329         | OGT       | -1.1436185            | 0.01538304 | Yes <sup>48</sup>  |
| NUFIP2    | Q7Z417 | T571/S572    | OGA       | 1.02597445            | 0.00252018 | No                 |
| PABPN1    | Q86U42 | S95          | OGA       | -1.1619051            | 0.00081583 | No                 |
